# Supplementary material for: Conformational biosensors reveal GPCR signalling from endosomes
Source: Springer Nature journal article supplement (doi:10.1038/nature12000), 2013-03-01
Supplement: 41586_2013_BFnature12000_MOESM330_ESM.pdf [file 41586_2013_BFnature12000_MOESM330_ESM.pdf]

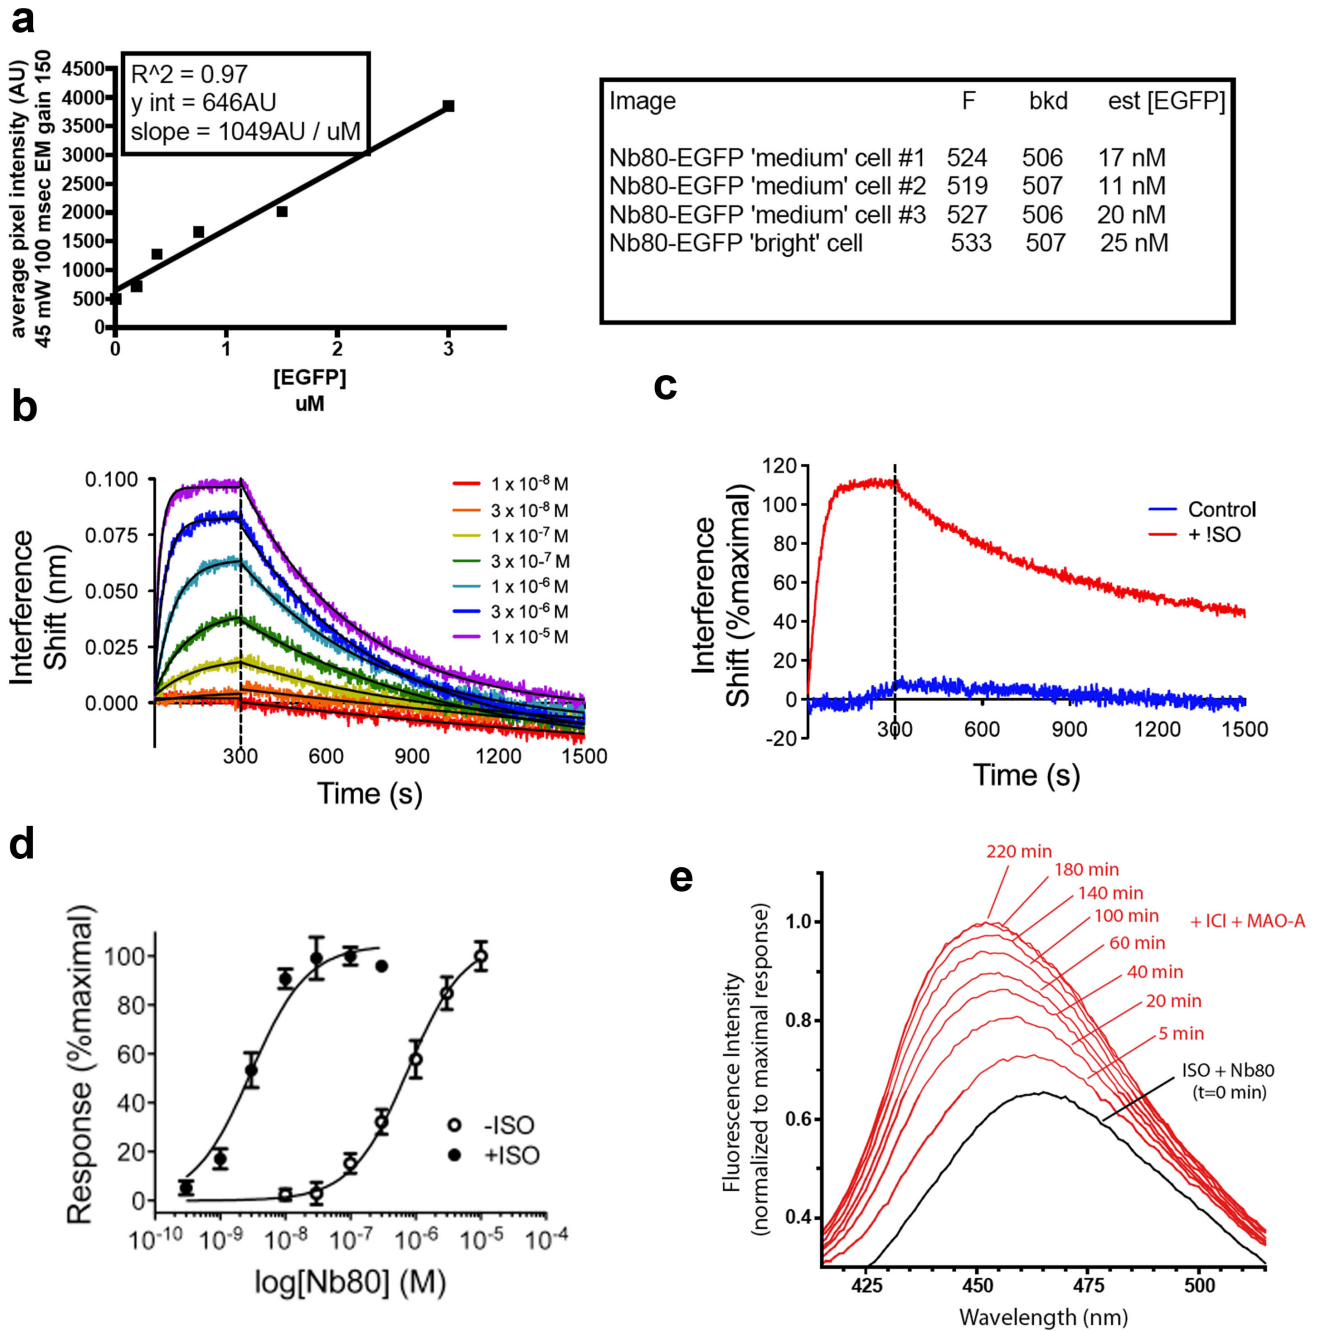

**Supplementary figure 1- Nb80-GFP is expressed at a concentration suitable to function as a conformational biosensor.** **a)** Graph shows a standard plot of purified EGFP (dissolved in Hank's balanced salt solution) fluorescence intensity imaged by confocal sectioning of droplets *in vitro*; line represents linear least-squares fit. Box shows estimation of cytoplasmic Nb80-GFP fluorescence intensities in confocal sections through the cytoplasm, from individual cells expressing Nb80-GFP in the range used in the present analysis, imaged in the absence of agonist, and with background for each determined from a blank region of the same image. Chemical concentration of Nb80-GFP in the cytoplasm was estimated by calibration of background-subtracted cytoplasmic fluorescence intensity for each example cell to the *in vitro* standard plot. A similar

intensity range was selected for analysis of Nb37-GFP distribution in individual cells, supporting an estimated cytoplasmic concentration for both biosensors of ~20 nM. **b)** Representative data showing the typical association and dissociation responses for Nb80 binding to  $\beta_2$ AR reconstituted into biotinylated rHDL particles when measured in the absence of isoproterenol (in color) along with single-phase exponential curve fits (in black). **c)** Time scan of 30 nM Nb80 binding in the absence (blue) or presence of 100  $\mu$ M isoproterenol (red). **d)** Maximum association responses at each Nb80 concentration in the absence (open circles) or presence of 100  $\mu$ M isoproterenol (ISO, closed circles), normalized to the overall maximum response produced and expressed as a percent of maximum. Data are from three experiments each and are plotted as mean  $\pm$  SEM.  $K_D$  values estimated for unliganded and isoproterenol-bound  $\beta_2$ AR are  $7.6 \pm 1.4 \times 10^{-7}$  M and  $2.9 \pm 0.5 \times 10^{-9}$  M, respectively. The association and dissociation assays suggest that Nb80 binds to isoproterenol-bound  $\beta_2$ AR with  $k_{on}$  and  $k_{off}$  values of  $1.1 \times 10^6 \pm 4.0 \times 10^4 \text{ M}^{-1} \text{ s}^{-1}$  and  $1.4 \times 10^{-3} \pm 5 \times 10^{-5} \text{ s}^{-1}$ , respectively, in generally good agreement with equilibrium binding affinity estimated from the maximal response data. **e)** Alternate estimate of Nb80 dissociation kinetics by spectral shift of bimane fluorescence measured for mBB- $\beta_2$ AR reconstituted into rHDL particles. Sequential spectra are shown after pre-binding isoproterenol and Nb80 followed by addition of the inverse agonist ICI-118551 and monoamine oxidase to minimize agonist re-binding.

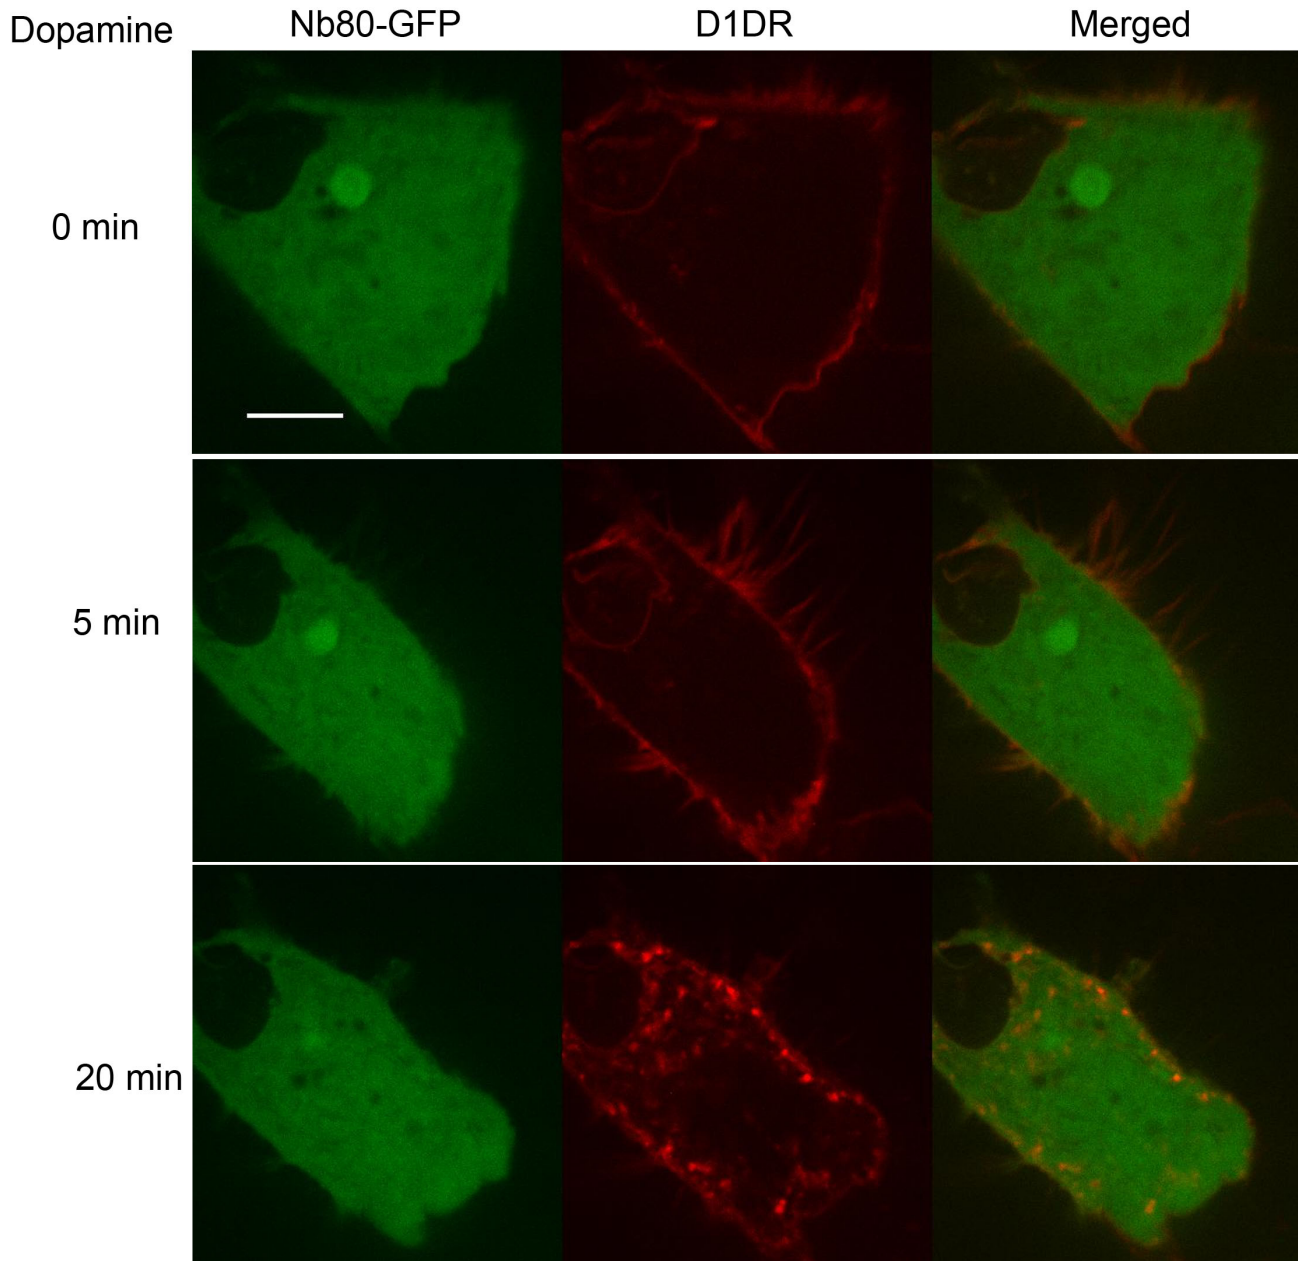

**Supplementary figure 2- D1 Dopamine receptor does not recruit Nb80-GFP to the PM or endosomes.** Representative images of cell coexpressing Nb80-GFP (green) and D1DR (red) at the indicated time (left) after 10 $\mu$ M dopamine addition. Scale bar=10  $\mu$ m.

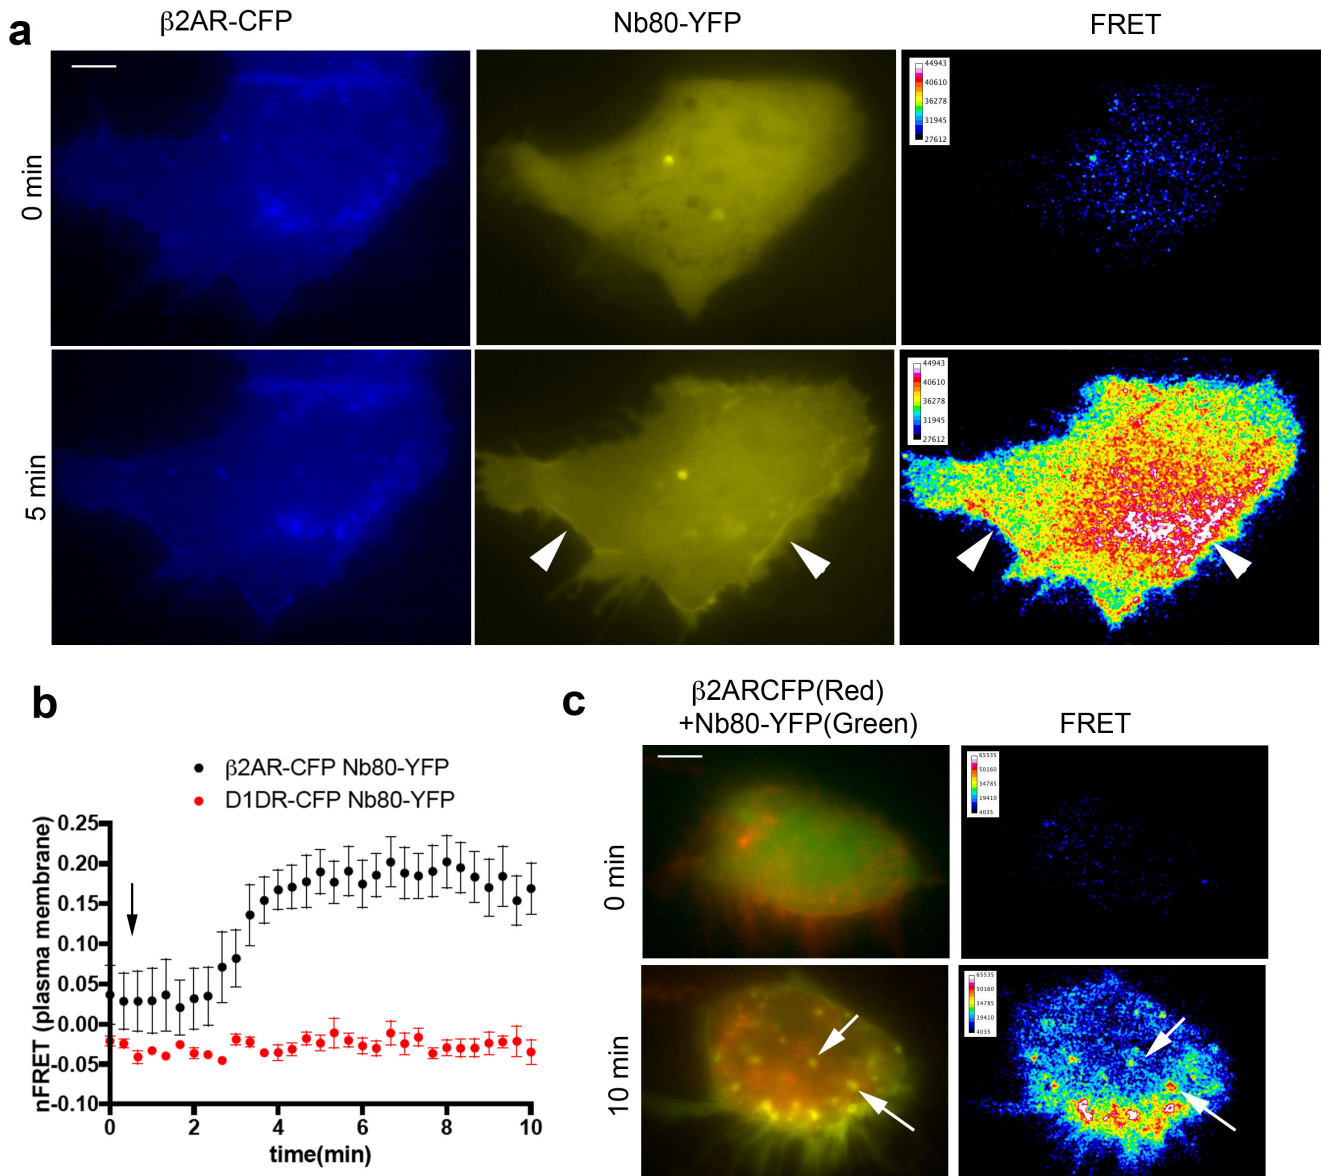

**Supplementary figure 3- FRET analysis of biosensor interaction with  $\beta$ 2AR in intact cells. a)** Representative image of  $\beta$ 2AR-CFP, Nb80-YFP and a pseudo-color image of pixel-by-pixel calculated FRET prior to (top row) and 5 min (bottom row) after 10  $\mu$ M isoproterenol addition to the culture medium (arrowheads indicate representative regions of the peripheral PM; it is not possible in these wide field images to resolve PM from cytoplasm in more central regions). **b)** Time course of nFRET determined from integrated intensity measurements of an ROI drawn around a peripheral region of the PM for  $\beta$ 2AR-CFP/Nb80-YFP nFRET after addition of 10  $\mu$ M isoproterenol (black line, arrow indicates time of agonist addition) and for D1DR-CFP/Nb80-YFP (red line) after addition of 10  $\mu$ M dopamine; n=10 cells, 3 experiments. **c)** Representative image of merged  $\beta$ 2AR-CFP, Nb80-YFP and a pseudo-color image of calculated FRET prior to (top row) and 10 min (bottom row) after 10  $\mu$ M isoproterenol addition (arrows indicate representative endosomes), in which FRET signal is evident also at endosomes. Scale bar=5  $\mu$ m.

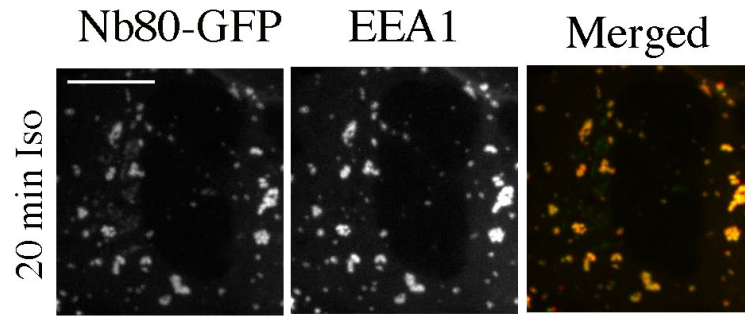

**Supplementary figure 4- Nb80-GFP colocalized with early endosomal marker.** Colocalization of Nb80-GFP with EEA1 in cells fixed after 20 min isoproterenol exposure; n=7 cells. Scale bar=5  $\mu$ m.

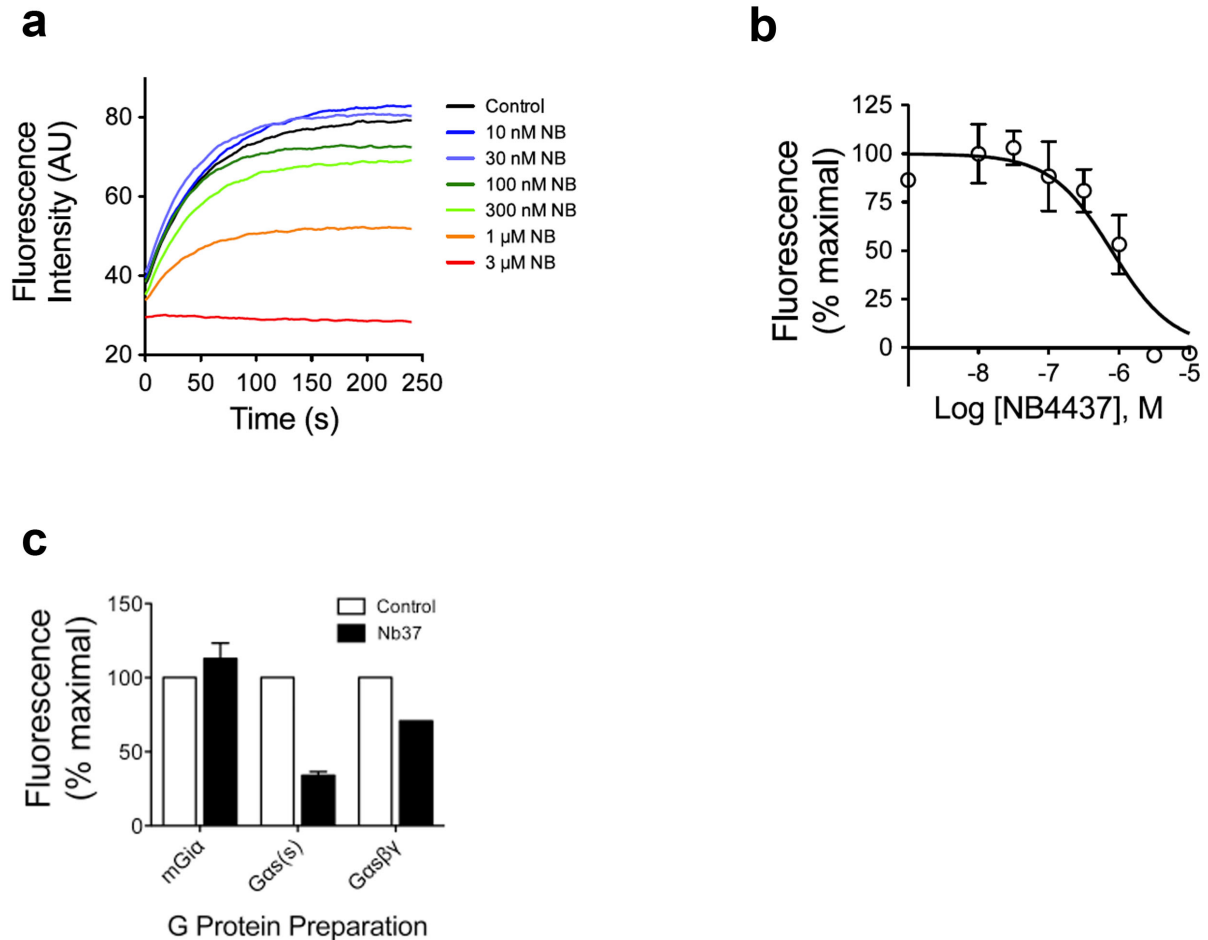

**Supplementary figure 5- Inhibition of bodipy-GTP $\gamma$ S-FL binding by Nb37.** The effect of Nb37 on GTP $\gamma$ S binding to purified G proteins was measured using 100 nM bodipy-GTP $\gamma$ S-FL as a fluorescent probe. **a)** Representative time scan of bodipy-GTP $\gamma$ S-FL binding to Gas in the presence of varying concentrations of Nb37. **b)** Concentration dependence of Nb37 binding to Gas. The fluorescence was measured at 240s following the addition of G protein at the concentrations indicated. Fluorescence intensity was plotted as a percent of control (no nanobody). The data were fitted by non-linear regression using Prism 5 (GraphPad, San Diego, CA) and are derived from two independent experiments. IC<sub>50</sub> for Nb37 inhibition of bodipy-GTP $\gamma$ S-FL is approximately  $7.9 \pm 2.4 \times 10^{-7}$  M. **c)** Maximal inhibition data showing that Nb37 inhibits bodipy-GTP $\gamma$ S-FL to Gas and the Gas $\beta$  $\gamma$  heterotrimer but not Gai.

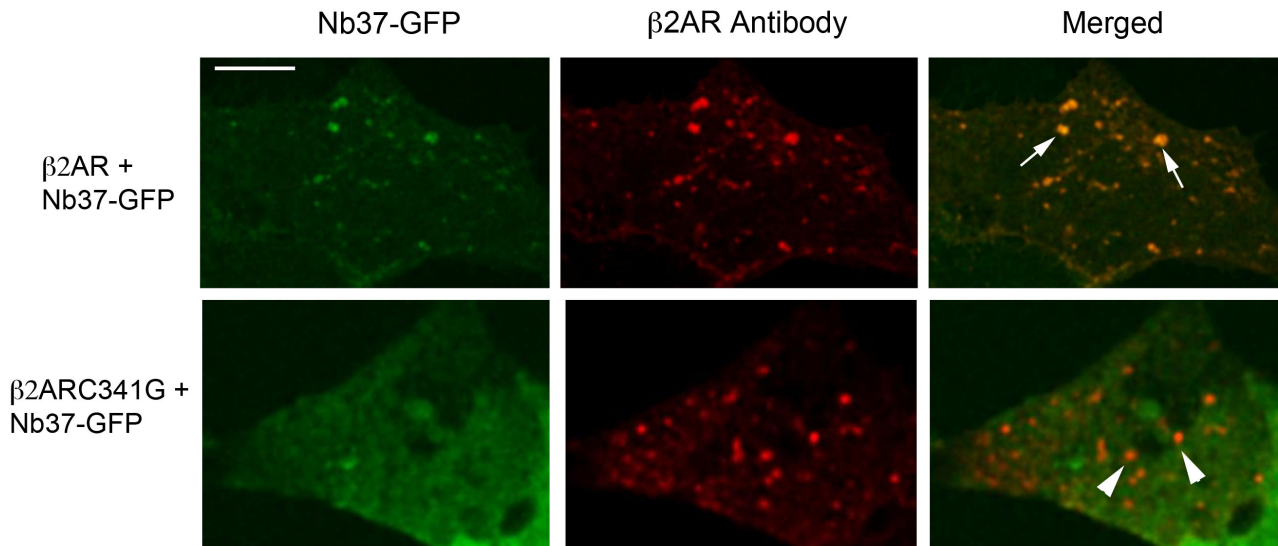

**Supplementary figure 6- Nb37-GFP is not recruited by the Gs coupling-defective mutant  $\beta$ 2AR.** Representative images of a cell co-expressing Nb37-GFP (green) and  $\beta$ 2AR (red) showing extensive colocalization between the two fluorophores in isoproterenol-treated cells (top row, Pearson's coefficient = 0.710; n= 340 endosomes). Representative images of a cell co-expressing Nb37-GFP (green) and the G protein coupling-defective mutant  $\beta$ 2ARC341G showing greatly reduced colocalization (bottom row, Pearson's coefficient = 0.294; n= 555 endosomes). Cells were fixed after 20 min incubation in the presence of 10 $\mu$ M isoproterenol. Arrows in merge indicate examples of endosomes colocalized with Nb37-GFP, arrowheads indicate examples of receptor-containing endosomes without detectable biosensor colocalization. Scale bar=10  $\mu$ m.

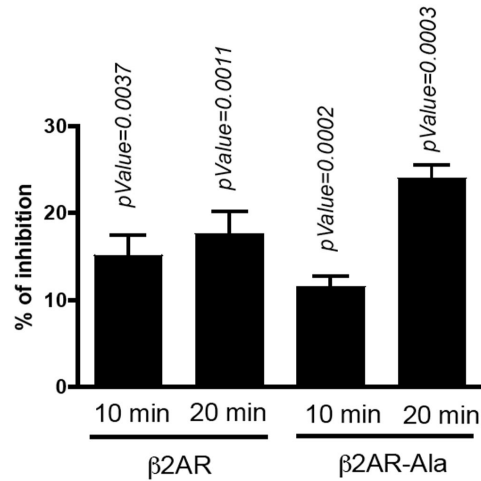

**Supplementary figure 7- The Dyngo-dependent component of initial cellular cAMP accumulation requires  $\beta 2AR$  endocytosis but not recycling.** Inhibition of whole cell cAMP response produced by 15 min pre-incubation with 30 $\mu M$  Dyngo4a, assessed using luminometry assay 10 and 20 min after subsequent addition of 10  $\mu M$  isoproterenol to the culture medium. Left set of bars represents results from cells expressing wild type  $\beta 2AR$ . Right set of bars represents results from cells expressing the recycling-defective mutant  $\beta 2AR-Ala$  (mean  $\pm$  SEM, n=10 experiments; P values determined at each time point above the corresponding bar).
